# Supplementary material for: The Mucolipin TRPML2 Channel Enhances the Sensitivity of Multiple Myeloma Cell Lines to Ibrutinib and/or Bortezomib Treatment
Source: MDPI journal article supplement (doi:10.3390/biom12010107), 2022-01-09
Supplement: s1 [file s1]

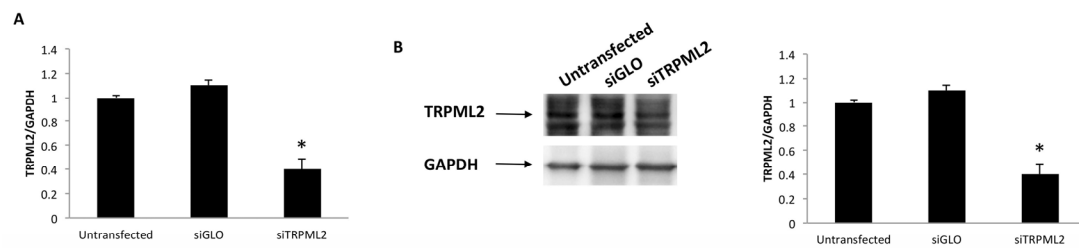

**Supplementary Figure S1.** TRPML2 silencing in RPMI cell line. A) The relative TRPML2 mRNA expression in untransfected, siGLO and siTRPML2 RPMI cells was evaluated by qRT-PCR. TRPML2 mRNA levels were normalized for GAPDH expression. Data are expressed as mean  $\pm$  SD. \* $p < 0.05$  vs untransfected and siGLO cells. B) Total lysates were separated on 8% SDS-PAGE and probed with anti-TRPML2 and anti-GAPDH Abs. TRPML2 densitometry values were normalized to GAPDH used as loading control. Blots are representative of one of three separate experiments. \* $p < 0.01$  vs untransfected and siGLO cells.
